# Supplementary material for: A Three-Year Analysis of Toxic Benzene Levels and Associated Impact in Ploieşti City, Romania
Source: MDPI journal article supplement (doi:10.3390/toxics11090748), 2023-09-02
Supplement: s1 [file s1]

## A three-year analysis of toxic benzene levels and associated impact in Ploiesti City, Romania

Mia Sanda <sup>1</sup>, Daniel Dunea <sup>2,\*</sup>, Stefania Iordache <sup>3</sup>, Alin Pohoata <sup>4</sup>, Ana-Maria Glod-Lendvai <sup>2</sup> and Ion Onutu <sup>1</sup>

**Table S1.** Main parameters used to define the scenarios for ADD and LADD calculations in ExpoFIRST and corresponding equations.

| Variable                                         | Selection/Input                                                                                                                                                                                                                                                                                                                                                                                                                                                                                                                                                                                          |
|--------------------------------------------------|----------------------------------------------------------------------------------------------------------------------------------------------------------------------------------------------------------------------------------------------------------------------------------------------------------------------------------------------------------------------------------------------------------------------------------------------------------------------------------------------------------------------------------------------------------------------------------------------------------|
| Route of exposure                                | Inhalation                                                                                                                                                                                                                                                                                                                                                                                                                                                                                                                                                                                               |
| Exposure descriptor                              | central tendency                                                                                                                                                                                                                                                                                                                                                                                                                                                                                                                                                                                         |
| medium type                                      | air                                                                                                                                                                                                                                                                                                                                                                                                                                                                                                                                                                                                      |
| Location, activity category, or product category | Total outdoors                                                                                                                                                                                                                                                                                                                                                                                                                                                                                                                                                                                           |
| Gender                                           | Male and Female                                                                                                                                                                                                                                                                                                                                                                                                                                                                                                                                                                                          |
| Manage contaminants                              | Molecular weight (78.11184 g/mol); Dermal permeability coefficient (0.14 cm/h)                                                                                                                                                                                                                                                                                                                                                                                                                                                                                                                           |
| Exposure Frequency (EF)                          | 100 days (ADD); 365 days (LADD)                                                                                                                                                                                                                                                                                                                                                                                                                                                                                                                                                                          |
| Exposure Time (ET)                               | Scenario 1 and 2 (default); Scenario 3 (180 minutes for all age bins)                                                                                                                                                                                                                                                                                                                                                                                                                                                                                                                                    |
| ADD                                              | $ADD = (C \times InhR \times ET \times EF \times ED) / (1440 \text{ (min/day)} \times AT \times BW)$ where:<br>ADD - Average Daily Dose (mg/kg-day)<br>C - Concentration of contaminant in air (mg/m <sup>3</sup> )<br>EF - Exposure Frequency (days/year)<br>ED - Exposure Duration (years)<br>AT - Averaging Time (days)<br>InhR - Inhalation Rate (m <sup>3</sup> /day)<br>ET - Exposure Time (min/day)<br>BW - Body Weight (kg).                                                                                                                                                                     |
| LADD                                             | $LADD = (C \times 1day \times InhR \times ET \times EF \times ED) / (24 \text{ hours} \times [BW] \times AT)$ where:<br>LADD - Lifetime average daily dose (mg/kg-day)<br>C - Concentration of contaminant in air (mg/m <sup>3</sup> )<br>InhR - Inhalation rate (m <sup>3</sup> /kg-day)<br>ET - Exposure time (hours/day)<br>EF - Exposure frequency (days/year)<br>ED - Exposure duration (years)<br>AT - Average time (days)<br><i>For cancer effects, equals 70 years * 365 days/year</i><br>[BW] - Body weight (kg) will be included in the denominator, if InhR is not normalized to body weight. |

**EPA's Exposure Factors Interactive Resource for Scenarios Tool**

Current Scenario: [Media & Receptors](#) [Contaminant](#) [Exposure Factors](#) [Results](#) [Go To Scenario](#)

Scenario Name: LADD

Route of Exposure: Inhalation Dose Metric: LADD Exposure Descriptor: Central Tendency

General Model:

$$LADD = \frac{C_{air} \times 1day \times InhR \times ET \times EF \times ED}{24 \text{ hours} \times [BW] \times AT}$$

LADD = Lifetime average daily dose (mg/kg-day)  
 C<sub>air</sub> = Concentration of contaminant in air (mg/m<sup>3</sup>)  
 InhR = Inhalation rate (m<sup>3</sup>/kg-day)  
 ET = Exposure time (hours/day)  
 EF = Exposure frequency (days/year)  
 ED = Exposure duration (years)  
 AT = Averaging time (days)  
 For cancer effects, equals 70 years \* 365 days/year

[BW] = Body weight (kg) will be included in the denominator if InhR is not normalized to body weight.

**Note:** Equation shown here is the general equation. The units in final equation shown on the results tab may differ depending on user selections (e.g., inhalation rate may be in units of m<sup>3</sup>/day, m<sup>3</sup>/min, or m<sup>3</sup>/kg).

Parameter Selections:

|                               | Central Tendency                 | Upper Percentile      |
|-------------------------------|----------------------------------|-----------------------|
| Inhalation Rate (InhR)        | <input checked="" type="radio"/> | <input type="radio"/> |
| Contaminant Concentration (C) | <input checked="" type="radio"/> | <input type="radio"/> |
| Exposure Time (ET)            | <input checked="" type="radio"/> | <input type="radio"/> |
| Exposure Frequency (EF)       | <input checked="" type="radio"/> | <input type="radio"/> |
| Event Frequency (EV)          | <input checked="" type="radio"/> | <input type="radio"/> |

Exposure duration (ED) and averaging time (AT) are auto-calculated and are based on continuous exposure. EV and ET may not apply in all scenarios. The mean will be used for body weight (BW) to normalize unadjusted inhR.

[Record Scenario Notes](#) [Next Page](#)

---

**EPA's Exposure Factors Interactive Resource for Scenarios Tool**

Current Scenario: [Inhalation\(LADD\)](#) [Central Tendency](#) [Media & Receptors](#) [Contaminant](#) [Exposure Factors](#) [Results](#) [Go To Scenario](#)

Route of Exposure: Inhalation Scenario Type: LADD Exposure Descriptor: Central Tendency

Media Type: Air Inhalation Rate Type: Long-Term (daily rate)

Location, Activity, or Product: Total Outdoors Location, Activity, or Product Subgroup: All [Search Categories](#)

Gender: Male and Female Intensity:

Define Receptors of Interest: [define age bins](#) [delete all age bins](#) [define groups](#) [delete all groups](#)

User-Defined Age Bins: [define age bins](#) [delete all age bins](#)

Other Population Groups: [define groups](#) [delete all groups](#)

Group Type: User-Defined Age Bin Group Name: Birth to < 70 years

[Record Scenario Notes](#) [Next Page](#)

---

**Exposure Calculator**

**EPA's Exposure Factors Interactive Resource for Scenarios Tool**

Current Scenario: [Inhalation\(LADD\)](#) [Central Tendency](#) [Air](#) [Total Outdoors](#) [All](#) [Male and Female](#) [Long-Term \(daily rate\)](#) [benzene](#) [0.035](#) [mg/m3](#) [central tendency](#) [Data Source:](#) [Manage Contaminants](#) [Go To Scenario](#)

**Important Note:** **ExposureCalculator** does not contain contaminant-specific data. Users must supply their data, which can then be saved and managed in their local version of the tool.

Contaminant Evaluated: benzene

Contaminant Concentration (C): 0.035 Units: mg/m<sup>3</sup> central tendency

Data Source\*: [Manage Contaminants](#) \*not a required field

**Manage Chemicals**

| Contaminant Name | MW      | Kp   |
|------------------|---------|------|
| benzene          | 78.1184 | 0.34 |

MW = molecular weight (g/mol)  
 Kp = dermal permeability coefficient (cm/hour)

[Save & Close](#)

---

**Exposure Calculator**

**EPA's Exposure Factors Interactive Resource for Scenarios Tool**

Current Scenario: [Inhalation\(LADD\)](#) [Central Tendency](#) [Air](#) [Total Outdoors](#) [All](#) [Male and Female](#) [Long-Term \(daily rate\)](#) [benzene](#) [0.035](#) [mg/m3](#) [Go To Scenario](#)

Scenario Description: [Media & Receptors](#) [Contaminant](#) [Exposure Factors](#) [Results](#)

Algorithm:  $LADD = \frac{C_{air}(mg/m^3) \times InhR(m^3/day) \times ET(min/day) \times EF(days/year) \times ED(years)}{1440(min/day) \times AT(days) \times BW(kg)}$

Select Exposure Group: [Age Bin: Birth to < 70 years](#)

| Parameter Name     | Value | Units               | Description*                                                                               |
|--------------------|-------|---------------------|--------------------------------------------------------------------------------------------|
| inhalation rate    | 15    | m <sup>3</sup> /day | EPA Table 9-1 MB&F; Mean; Original Data Source: Aroos-Arth and Blandford, 2007             |
| exposure time      | 180   | min/day             | User-defined; Mean                                                                         |
| exposure frequency | 365   | days/year           | User-defined; Mean                                                                         |
| exposure duration  | 30    | years               | User-defined                                                                               |
| averaging time     | 25550 | days                | 70 years * 365 days                                                                        |
| body weight        | 70    | kg                  | EPA Table 9-3 MB&F; Mean; Original Data Source: U.S. EPA Analysis of NHANES 1999-2006 data |

[Bulk Modify Factors](#)

[Quick Reference Tables](#)

\* Quick reference tables contain data that are not programmed into ExposureCalculator, but that may be useful for estimating certain exposure factors.

\* To expand, click the symbol

[Record Scenario Notes](#) [Next Page](#)

---

**EPA's Exposure Factors Interactive Resource for Scenarios Tool**

Current Scenario: [Inhalation\(LADD\)](#) [Central Tendency](#) [Air](#) [Total Outdoors](#) [All](#) [Male and Female](#) [Long-Term \(daily rate\)](#) [benzene](#) [0.035](#) [mg/m3](#) [Go To Scenario](#)

Scenario Description: [Media & Receptors](#) [Contaminant](#) [Exposure Factors](#) [Results](#)

Algorithm:  $LADD = \frac{C_{air}(mg/m^3) \times InhR(m^3/day) \times ET(min/day) \times EF(days/year) \times ED(years)}{1440(min/day) \times AT(days) \times BW(kg)}$

Results:

| Exposure Group      | Data Type | Result   | Units     |
|---------------------|-----------|----------|-----------|
| Birth to < 70 years | LADD      | 3.95E-04 | mg/kg-day |

Figure S1. Example of the LADD computation in ExpoFIRST (screen captures)

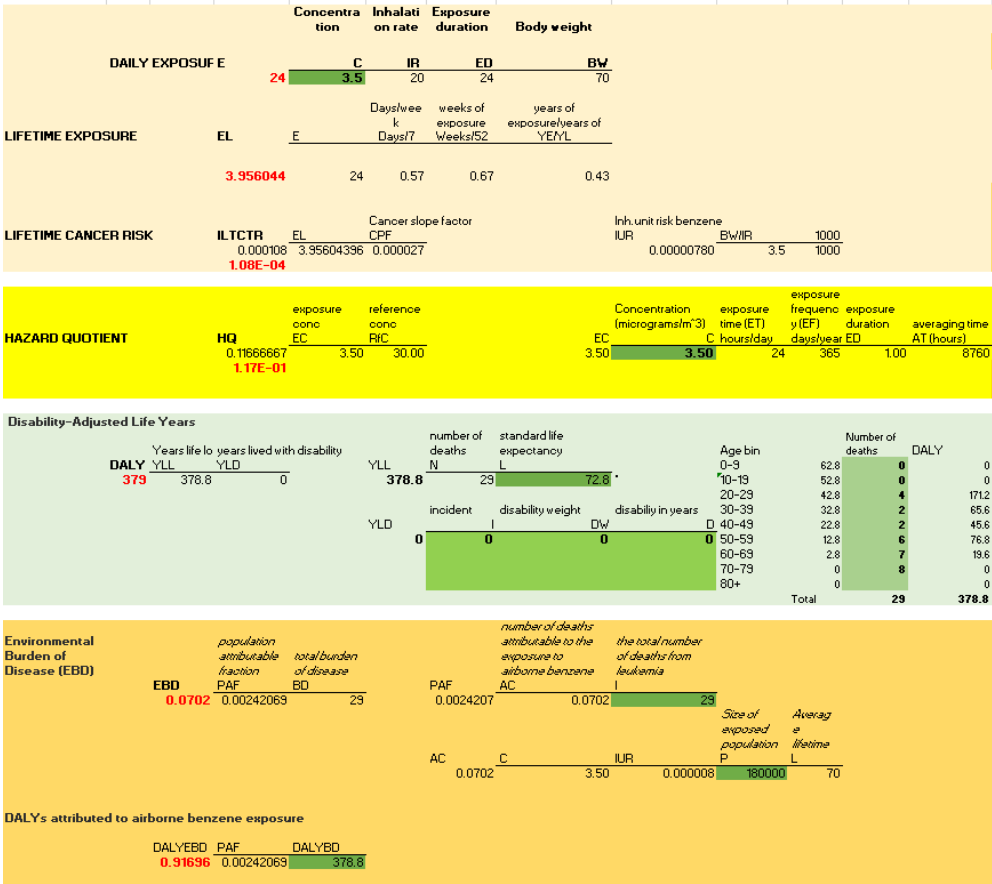

**Figure S2.** Screen capture with an example of parameters calculation (green cells are for inputs and red text highlights the values computed by the algorithms) – See Supplementary File 2 (excel file).

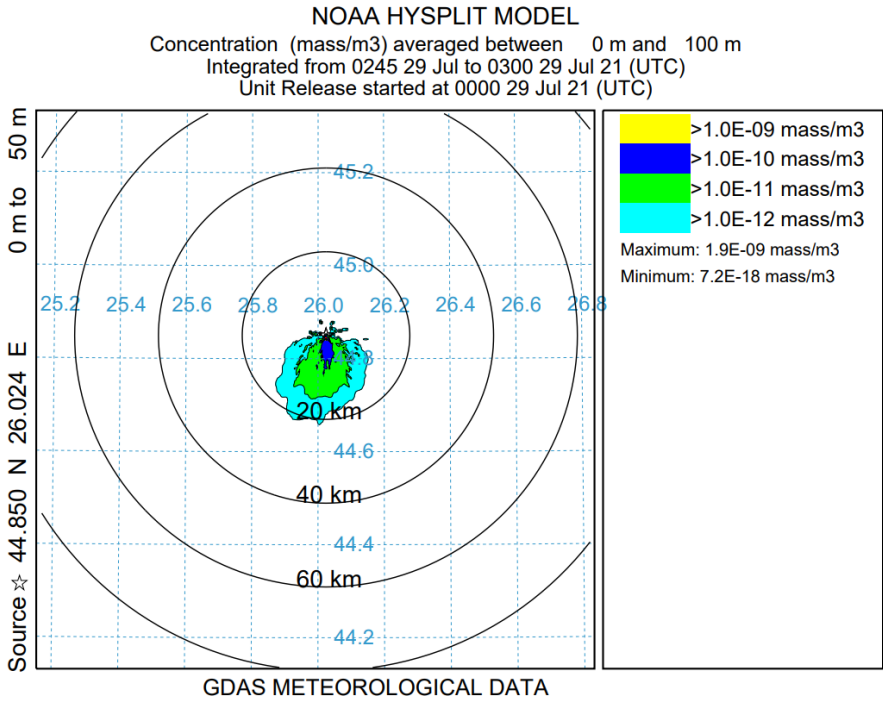

**Figure S3.** Dispersion modeling for the maximum concentration of benzene recorded in Ploiesti area using the HYSPLIT model

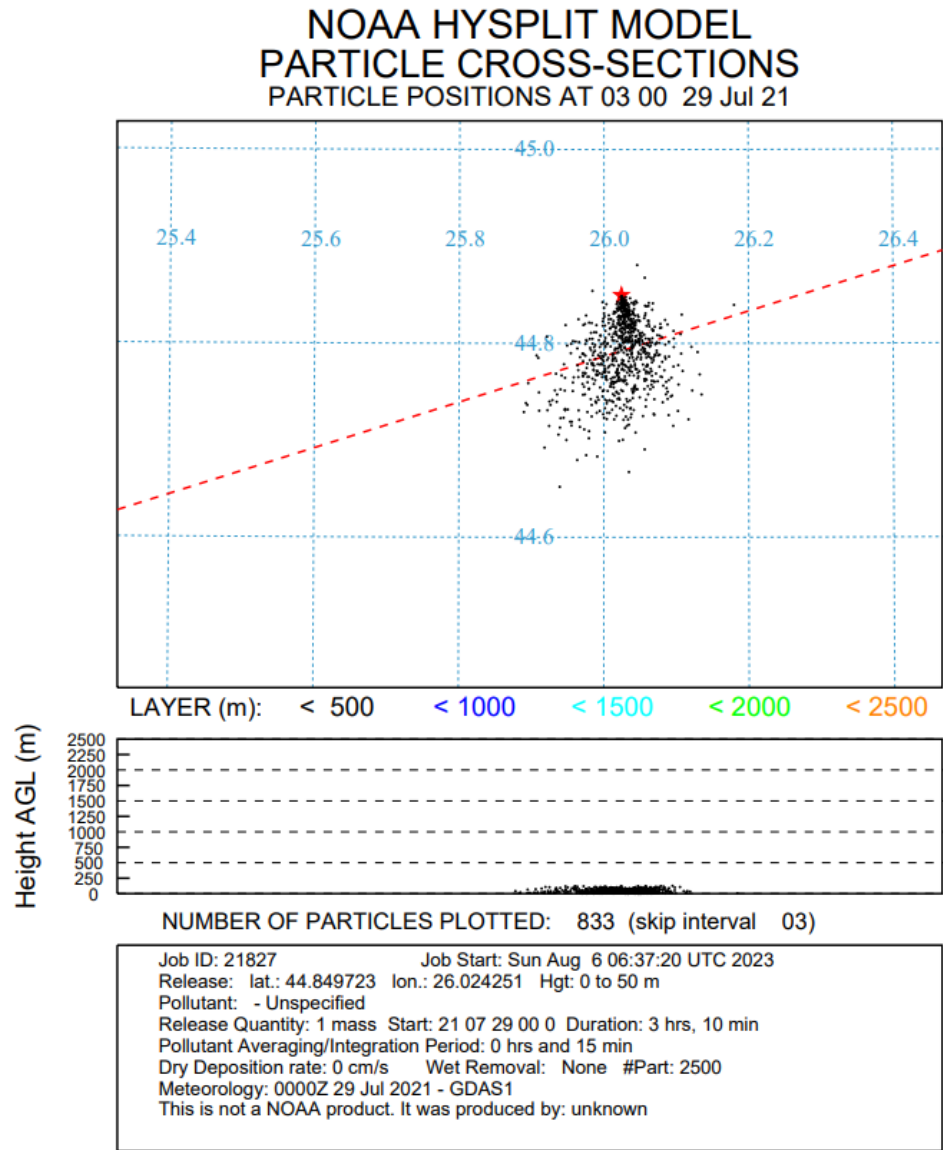

**Figure S4.** Modeling of the particle positions using HYSPLIT Model

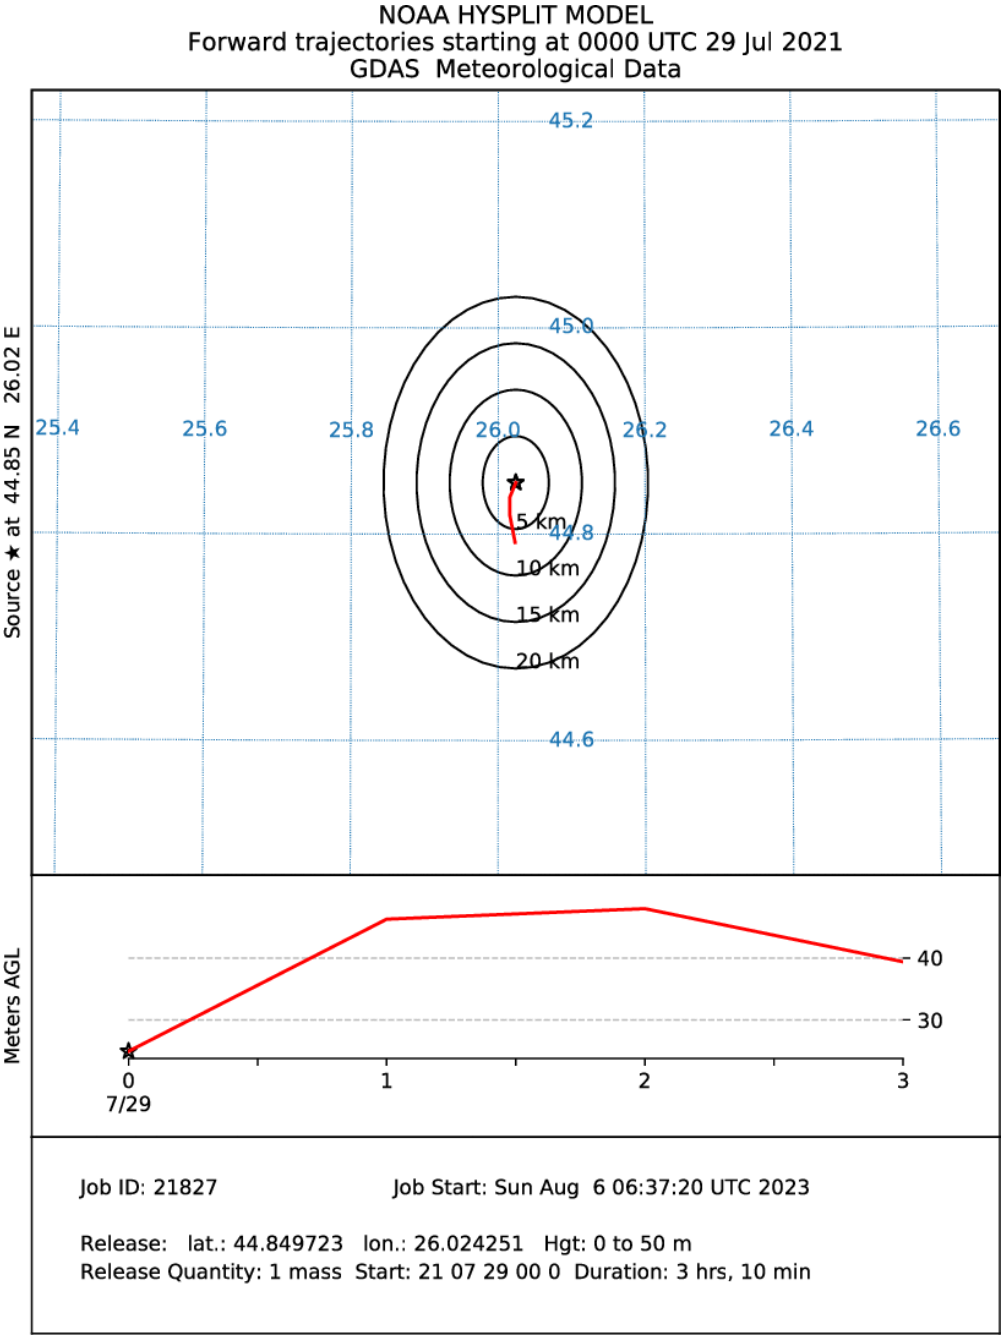

Figure S5. Forward trajectories provided by the HYSPLIT model

**Table S2.** Annual concentrations of benzene ( $\mu\text{g}/\text{m}^3$ ) retrieved from literature and results from the current study.

| City                      | Country                    | Type of Site                       | Benzene<br>( $\mu\text{g}/\text{m}^3$ )         | Source                               |
|---------------------------|----------------------------|------------------------------------|-------------------------------------------------|--------------------------------------|
| Berlin                    | Germany                    | Urban region                       | 2.09                                            | Monod et al, 2001 [29]               |
| Bucharest                 | Romania                    | Urban region                       | 1.75                                            |                                      |
| Krakow                    | Poland                     | Urban region                       | 2.43                                            |                                      |
| London                    | U.K.                       | Urban region                       | 0.8                                             |                                      |
| Prague                    | Czech Republic             | Urban region                       | 2.46                                            |                                      |
| Rome                      | Italy                      | Urban region                       | 3.62                                            |                                      |
| Vienna                    | Austria                    | Urban region                       | 0.99                                            |                                      |
| Warsaw                    | Poland                     | Urban region                       | 0.75                                            |                                      |
| Paris                     | France                     | Urban region                       | 1.42                                            |                                      |
| Hong Kong                 | Special Region of<br>China | Urban region                       | 1.64                                            | Jia et al., 2016 [30]                |
| Lanzhou,                  | China                      | Urban region                       | 1.94                                            |                                      |
| Wuhan                     |                            | Urban region                       | 1.7                                             |                                      |
| Guangzhou                 |                            | Urban region                       | 2.4                                             |                                      |
| Shanghai                  |                            | Industrial (petrochemical<br>area) | 6.41                                            |                                      |
| Changzhi                  |                            | Industrial                         | 1.40                                            | Zhang et al., 2022 [34]              |
| Houston                   | USA                        | Urban region                       | 0.34                                            | Jobson et al., 2004 [35]             |
| Naples Metropolitan area  | Italy                      | Industrial                         | 9                                               | Iovino et al., 2009 [36]             |
| Milan                     |                            | Industrial                         | 1.9 (Before lockdown)<br>0.96 (During lockdown) | Collivignarelli et al.,<br>2020 [37] |
| Agii Theodore Corinthia   |                            | Industrial<br>(oil refinery)       | 0.8                                             | Kalabokas et al., 2001<br>[38]       |
| Athens (Patisision)       | Greece                     | Urban<br>(heavy traffic)           | 5.63                                            | Begou and Kassomenos<br>(2020) [9]   |
| Piraeus                   |                            | Harbor area                        | 2.81                                            |                                      |
| Nea Smirni                |                            | Urban                              | 1.68                                            |                                      |
| Elefsina                  |                            | Urban-Industrial                   | 0.81                                            |                                      |
| Thessaloniki (Agia Sofia) |                            | Urban                              | 3                                               |                                      |
| Kordelio                  |                            | Urban-Industrial                   | 2.14                                            |                                      |
| Sindos                    |                            | Urban-Industrial                   | 0.96                                            |                                      |
| Ulsan (industrial area)   | Koreea                     | Industrial                         | 2.1                                             | Na et al., 2001 [39]                 |

|            |          |                                      |                                                                     |                             |
|------------|----------|--------------------------------------|---------------------------------------------------------------------|-----------------------------|
| Port Moody | Canada   | Industrial (petrochemical area)      | 0.6                                                                 | Ying et al.,2020 [40]       |
| Kaohsiung  | Taiwan   | Industrial (petrochemical area)      | 1.32-2.31 at Site A<br>1.65-3.30 at Site B                          | Hsu et al., 2022 [41]       |
| Delhi      | India    | Industrial                           | 6.08 (Before lockdown)<br>0.38 (During lockdown)                    | Pakkattil et al., 2021 [42] |
| Mumbai     |          | Industrial                           | 1.65 (Before lockdown)<br>0.47 (During lockdown)                    |                             |
| Bengaluru  |          | Industrial                           | 0.99 (Before lockdown)<br>0.332 (During lockdown)                   |                             |
| Shah Alam  | Malaysia | Industrial                           | 1.11+/- 0.870 (Before lockdown)<br>0.640+/- 0.350 (During lockdown) | Latif et al., 2019 [43]     |
| Cheras     |          | Industrial                           | 1.05+/- 0.830 (Before lockdown)<br>0.640+/- 0.370 (During lockdown) |                             |
| Ploiești   | Romania  | Urban, Industrial petrochemical area | 3.25                                                                | Bodor et al., 2022 [18]     |
|            |          |                                      | 3.5                                                                 | (this study)                |
|            |          |                                      | 2.7 (During lockdown)                                               |                             |
