# Supplementary material for: A Three-Year Analysis of Toxic Benzene Levels and Associated Impact in Ploieşti City, Romania
Source: Toxics. 2023 Sep 2;11(9):748. doi: 10.3390/toxics11090748 (PMC10537639; doi:10.3390/toxics11090748)
Supplement: Supplementary file 1 [file toxics-11-00748-s001.zip › Supplementary File S1.xlsx]

## Sheet: All Scenarios
ExpoFIRST	proba | Inhalation | ADD | Central Tendency | Air | Total Outdoors | All | Male and Female | Long-Term (daily rate) | benzene
Date Created: 02/08/2023	ADD = ( C (mg/m3) * InhR (m3/day) * ET (min/day) * EF (days/year) * ED (years)) / (1440 (min/day) * AT (days) * BW (kg))
	Birth to < 70 years
Parameter	Value	Units	Description
ADR
ADD	0.000559045	mg/kg-day
LADD
Adj. Air Conc (Lifetime)
Adj. Air Conc (Less than Lifetime)
This row intentionally blank
This row intentionally blank
Scenario Notes

## Sheet: proba
ExpoFIRST	proba | Inhalation | ADD | Central Tendency | Air | Total Outdoors | All | Male and Female | Long-Term (daily rate) | benzene
Date Created: 02/08/2023	ADD = ( C (mg/m3) * InhR (m3/day) * ET (min/day) * EF (days/year) * ED (years)) / (1440 (min/day) * AT (days) * BW (kg))
	Birth to < 1 month			1 month to < 3 months			3 months to < 6 months			6 months to < 1 year			1 year to < 2 years			2 years to < 3 years			3 years to < 6 years			6 years to < 11 years			11 years to < 16 years			16 years to < 21 years			21 years to < 70 years
Parameter	Value	Units	Description/Weight	Value	Units	Description/Weight	Value	Units	Description/Weight	Value	Units	Description/Weight	Value	Units	Description/Weight	Value	Units	Description/Weight	Value	Units	Description/Weight	Value	Units	Description/Weight	Value	Units	Description/Weight	Value	Units	Description/Weight	Value	Units	Description/Weight
ADR
ADD	0.000428082	mg/kg-day	1.19E-03	5.41754e-05	mg/kg-day	2.38E-03	0.000164445	mg/kg-day	3.57E-03	0.000931358	mg/kg-day	7.14E-03	0.000288392	mg/kg-day	1.43E-02	0.000559526	mg/kg-day	1.43E-02	0.000663267	mg/kg-day	4.29E-02	0.000568622	mg/kg-day	7.14E-02	0.000305486	mg/kg-day	7.14E-02	0.000265076	mg/kg-day	7.14E-02	0.000613218	mg/kg-day	7.00E-01
LADD
Adj. Air Conc (Lifetime)
Adj. Air Conc (Less than Lifetime)
This row intentionally blank
This row intentionally blank
Concentration (C)	0.06	mg/m3		0.06	mg/m3		0.06	mg/m3		0.06	mg/m3		0.06	mg/m3		0.06	mg/m3		0.06	mg/m3		0.06	mg/m3		0.06	mg/m3		0.06	mg/m3		0.06	mg/m3
Exposure Frequency (EF)	100	days/year	user-defined; Mean	100	days/year	user-defined; Mean	100	days/year	user-defined; Mean	100	days/year	user-defined; Mean	100	days/year	user-defined; Mean	100	days/year	user-defined; Mean	100	days/year	user-defined; Mean	100	days/year	user-defined; Mean	100	days/year	user-defined; Mean	100	days/year	user-defined; Mean	100	days/year	user-defined; Mean
Exposure Duration (ED)	0.0833333	years	Duration based on age bin	0.166667	years	Duration based on age bin	0.25	years	Duration based on age bin	0.5	years	Duration based on age bin	1	years	Duration based on age bin	1	years	Duration based on age bin	3	years	Duration based on age bin	5	years	Duration based on age bin	5	years	Duration based on age bin	5	years	Duration based on age bin	49	years	Duration based on age bin
Averaging Time (AT)	30.4167	days	ED * 365 days	60.8333	days	ED * 365 days	91.25	days	ED * 365 days	182.5	days	ED * 365 days	365	days	ED * 365 days	365	days	ED * 365 days	1095	days	ED * 365 days	1825	days	ED * 365 days	1825	days	ED * 365 days	1825	days	ED * 365 days	17885	days	ED * 365 days
Inhalation Rate (InhR)	3.6	m3/day	EFH Table 6-1 M&F; Mean; Original Data Source: Arcus‑Arth and Blaisdell, 2007	3.5	m3/day	EFH Table 6-1 M&F; Mean; Original Data Source: Arcus‑Arth and Blaisdell, 2007, Brochu et al., 2006a	4.1	m3/day	EFH Table 6-1 M&F; Mean; Original Data Source: Arcus‑Arth and Blaisdell, 2007, Brochu et al., 2006a	5.4	m3/day	EFH Table 6-1 M&F; Mean; Original Data Source: Arcus‑Arth and Blaisdell, 2007, Brochu et al., 2006a	8	m3/day	EFH Table 6-1 M&F; Mean; Original Data Source: Arcus‑Arth and Blaisdell, 2007, Brochu et al., 2006a, U.S. EPA, 2009, Stifelman, 2007	8.9	m3/day	EFH Table 6-1 M&F; Mean; Original Data Source: Arcus‑Arth and Blaisdell, 2007, Brochu et al., 2006a, U.S. EPA, 2009, Stifelman, 2007	10.1	m3/day	EFH Table 6-1 M&F; Mean; Original Data Source: Arcus‑Arth and Blaisdell, 2007, Brochu et al., 2006a, U.S. EPA, 2009, Stifelman, 2007	12	m3/day	EFH Table 6-1 M&F; Mean; Original Data Source: Arcus‑Arth and Blaisdell, 2007, Brochu et al., 2006a, U.S. EPA, 2009, Stifelman, 2007	15.2	m3/day	EFH Table 6-1 M&F; Mean; Original Data Source: Arcus‑Arth and Blaisdell, 2007, Brochu et al., 2006a, U.S. EPA, 2009, Stifelman, 2007	16.3	m3/day	EFH Table 6-1 M&F; Mean; Original Data Source: Arcus‑Arth and Blaisdell, 2007, Brochu et al., 2006a, U.S. EPA, 2009, Stifelman, 2007	15.5469	m3/day	EFH Table 6-1 M&F; Mean; Original Data Source: Brochu et al., 2006a, U.S. EPA, 2009, Stifelman, 2007
Exposure Time (ET)	50	min/day	User-defined; Mean	8	min/day	EFH Table 16-1 M&F; Mean; Original Data Source: U.S. EPA analysis of source data from Wiley et al. (1991) for age groups from birth to <12 months; Other Notes: activities are averaged over seasons; average for boys and girls, whole population	26	min/day	EFH Table 16-1 M&F; Mean; Original Data Source: U.S. EPA analysis of source data from Wiley et al. (1991) for age groups from birth to <12 months; Other Notes: activities are averaged over seasons; average for boys and girls, whole population	139	min/day	EFH Table 16-1 M&F; Mean; Original Data Source: U.S. EPA analysis of source data from Wiley et al. (1991) for age groups from birth to <12 months; Other Notes: activities are averaged over seasons; average for boys and girls, whole population	36	min/day	EFH Table 16-1 M&F; Mean; Original Data Source: U.S. EPA re-analysis of source data from U.S. EPA (1996) for age groups from 1 to <21 years; Other Notes: activities are averaged over seasons; whole population	76	min/day	EFH Table 16-1 M&F; Mean; Original Data Source: U.S. EPA re-analysis of source data from U.S. EPA (1996) for age groups from 1 to <21 years; Other Notes: activities are averaged over seasons; whole population	107	min/day	EFH Table 16-1 M&F; Mean; Original Data Source: U.S. EPA re-analysis of source data from U.S. EPA (1996) for age groups from 1 to <21 years; Other Notes: activities are averaged over seasons; whole population	132	min/day	EFH Table 16-1 M&F; Mean; Original Data Source: U.S. EPA re-analysis of source data from U.S. EPA (1996) for age groups from 1 to <21 years; Other Notes: activities are averaged over seasons; whole population	100	min/day	EFH Table 16-1 M&F; Mean; Original Data Source: U.S. EPA re-analysis of source data from U.S. EPA (1996) for age groups from 1 to <21 years; Other Notes: activities are averaged over seasons; whole population	102	min/day	EFH Table 16-1 M&F; Mean; Original Data Source: U.S. EPA, 1996; Other Notes: activities are averaged over seasons; total minutes/24 hours (1,440) minus time outdoors, doers only; doers are those respondents who engaged or participated in the activity	282.735	min/day	EFH Table 16-1 M&F; Mean; Original Data Source: U.S. EPA, 1996; Other Notes: activities are averaged over seasons; total minutes/24 hours (1,440) minus time outdoors, doers only; doers are those respondents who engaged or participated in the activity
Body Weight (BW)	4.8	kg	EFH Table 8-3 M&F; Mean; Original Data Source: U.S. EPA Analysis of NHANES 1999−2006 data	5.9	kg	EFH Table 8-3 M&F; Mean; Original Data Source: U.S. EPA Analysis of NHANES 1999−2006 data	7.4	kg	EFH Table 8-3 M&F; Mean; Original Data Source: U.S. EPA Analysis of NHANES 1999−2006 data	9.2	kg	EFH Table 8-3 M&F; Mean; Original Data Source: U.S. EPA Analysis of NHANES 1999−2006 data	11.4	kg	EFH Table 8-3 M&F; Mean; Original Data Source: U.S. EPA Analysis of NHANES 1999−2006 data	13.8	kg	EFH Table 8-3 M&F; Mean; Original Data Source: U.S. EPA Analysis of NHANES 1999−2006 data	18.6	kg	EFH Table 8-3 M&F; Mean; Original Data Source: U.S. EPA Analysis of NHANES 1999−2006 data	31.8	kg	EFH Table 8-3 M&F; Mean; Original Data Source: U.S. EPA Analysis of NHANES 1999−2006 data	56.8	kg	EFH Table 8-3 M&F; Mean; Original Data Source: U.S. EPA Analysis of NHANES 1999−2006 data	71.6	kg	EFH Table 8-3 M&F; Mean; Original Data Source: U.S. EPA Analysis of NHANES 1999−2006 data	81.8286	kg	EFH Table 8-3 M&F; Mean; Original Data Source: U.S. EPA Analysis of NHANES 1999−2006 data
Ingestion Rate (IR)
Event Frequency (EV)
Dermal Absorption Fraction
Sum Surface Area (SA) x Soil Adherence Factor (AF):
SA x AF:arms
SA x AF:feet
SA x AF:hands
SA x AF:head
SA x AF:legs
SA x AF:trunk
SA x AF:total
SA x AF:user defined
Sum Skin Surface Area (SA):
SA:arms
SA:feet
SA:hands
SA:head
SA:legs
SA:trunk
SA:total
SA:user defined
DAevent
Lipid Fraction (FAT)
Dry-weight Conversion (DW)
Conversion Factor	1440	min/day		1440	min/day		1440	min/day		1440	min/day		1440	min/day		1440	min/day		1440	min/day		1440	min/day		1440	min/day		1440	min/day		1440	min/day
Conversion Factor
Conversion Factor
