# Supplementary material for: A Three-Year Analysis of Toxic Benzene Levels and Associated Impact in Ploieşti City, Romania
Source: Toxics. 2023 Sep 2;11(9):748. doi: 10.3390/toxics11090748 (PMC10537639; doi:10.3390/toxics11090748)
Supplement: Supplementary file 1 [file toxics-11-00748-s001.zip › Supplementary File S2.xlsx]

## Sheet: Sheet1 (2)
	SUPPLEMENTARY FILE 2
	A three-year analysis of toxic benzene levels and associated impact in Ploiesti City, Romania
	Mia Sanda 1, Daniel Dunea 2,*, Stefania Iordache 3, Alin Pohoata 4, Ana-Maria Glod-Lendvai 2 and Ion Onutu 1
	1	Faculty of Petroleum Processing and Petrochemistry, Petroleum-Gas University, Bulevardul București 39, 100680 Ploiesti, Romania; mia.sanda@upg-ploiesti.ro (M.S.); ionutu@upg-ploiesti.ro (I.O.)
	2	Department of Environmental Engineering, Faculty of Environmental Engineering and Food Science,
	Valahia University of Targoviste, Aleea Sinaia no.13, 130004 Targoviste, Romania
	3	Department of Food Engineering, Faculty of Environmental Engineering and Food Science,
	Valahia University of Targoviste, Aleea Sinaia no.13, 130004 Targoviste, Romania; stefania.iordache@yahoo.com (S.I.)
	4	Faculty of Sciences and Arts, Valahia University of Targoviste, Aleea Sinaia no.13,
	130004 Targoviste, Romania; alinpohoata@yahoo.com (A.P.)
	*	Correspondence: dan.dunea@valahia.ro (D.D.); Tel.: +40-769-076-854
	This file allows the computation of Lifetime Cancer Risk (LCR), Hazard Quotient (HQ), Disability-Adjusted Life Years (DALY) and Environmental Burden of Disease (EBD).
	Green cells are for inputs and red text highlights the values computed by the algorithms.
	For a complete description of the equations and variables integrated in this sheet please consult Begou and Kassomenos, 2020 (https://doi.org/10.1016/j.apr.2020.07.011)*
					Concentration	Inhalation rate	Exposure duration	Body weight
		DAILY EXPOSURE		E	C	IR	ED	BW						For more information regarding the exposure and health effects please consult https://www.epa.gov/sites/default/files/2016-09/documents/benzene.pdf
				24	3.5	20	24	70
						Days/week exposure	weeks of exposure	years of exposure/years of lifetime
	LIFETIME EXPOSURE			EL	E	Days/7	Weeks/52	YE/YL
				3.95604	24	0.571429	0.673077	0.428571						Interpretation of ILTCTR
														The ILTCR values represent the incremental probability of an individual developing cancer over a lifetime exposure to the potential carcinogen and is compared to the US EPA standard of 1×10-6 (i.e. 1 in 1,000,000 chances of developing cancer in the lifetime).
														The risk intervals for the ILTCR have been classified as:
						Cancer slope factor			Inh.unit risk benzene					· ILTCR >1×10-4 considered as “definite cancer risk”
	LIFETIME CANCER RISK			ILTCTR	EL	CPF			IUR	BW/IR	1000			· ILTCR value between 1×10-5 to 1×10-4 considered as “probable cancer risk”
				0.000108	3.95604	2.73e-05			7.8e-06	3.5	1000			· ILTCR value between 1×10-5 to 1×10-6 considered as “possible cancer risk”
				0.000108										· ILTCR <1×10-6 may be considered “acceptable”
					exposure conc	reference conc			Concentration (micrograms/m^3)	exposure time (ET)	exposure frequency (EF)	exposure duration	averaging time
	HAZARD QUOTIENT			HQ	EC	RfC		EC	C	hours/day	days/year	ED	AT (hours)
				0.2	6	30		6	6	24	365	1	8760	Interpretation of HQ
				0.2										· HQ>1 indicates that the long-term exposure may cause adverse non-carcinogenic health effects
														· HQ<1 indicates an acceptable level of exposure, because the dose level is lower than the RfC.
	Disability-Adjusted Life Years
			Years life lost	Years lived with disability			number of deaths	standard life expectancy		Age bin		Number of deaths	DALY
		DALY	YLL	YLD		YLL	N	L		0-9	62.8	0	0
		378.8	378.8	0		378.8	29	72.8	*	10-19	52.8	0	0
										20-29	42.8	4	171.2
							incident cases	disability weight	disabiliy in years	30-39	32.8	2	65.6
						YLD	I	DW	D	40-49	22.8	2	45.6
						0	0	0	0	50-59	12.8	6	76.8
										60-69	2.8	7	19.6
										70-79	0	8	0
										80+	0		0
											Total	29	378.8
	Environmental Burden of Disease (EBD)			population attributable fraction	total burden of disease			number of deaths attributable to the exposure to airborne benzene	the total number of deaths from leukemia
			EBD	PAF	BD		PAF	AC	I
			0.120343	0.00414975	29		0.00414975	0.120343	29
										Size of exposed population	Average lifetime duration
							AC	C	IUR	P	L
							0.120343	6	7.8e-06	180000	70
	DALYs attributed to airborne benzene exposure
			DALYEBD	PAF	DALYBD
			1.57193	0.00414975	378.8
	*Begou, P.; Kassomenos, P. One-year measurements of toxic benzene concentrations in the ambient air of Greece: An estimation of public health risk. Atmospheric Pollution Research 2020, 11 (10), 1829-1838.
	** Life expectancy in Romania (2021) - EUROSTAT (https://ec.europa.eu/eurostat/statistics-explained/images/0/02/Table01_Life_expectancy_at_birth_2021.png)
